# Supplementary material
Source: PubMed Central journal article supplement (PMC6490302)

**Figure S1.** Physical characteristics of (4-AP)-PLGA carriers of encapsulated 4-AP.

(A) (i) (4-AP)-PLGA microparticles made by a water/oil/water double emulsion technique displayed 200~500nm particle diameters. (ii) Measurement of cumulative amount of released 4-AP in vitro showed that 100mg of (4-AP)-PLGA particles continuously and steadily released 4-AP into PBS for at least 27 days. (B) (i) (4-AP)-PLGA films were made by solvent casting techniques. The PLGA film, when examined after fabrication, appears to be a flat, smooth, and evenly thin material with approximate 30-40 $\mu$ m thickness. (ii) Measurements of the cumulative amount of released 4-AP in vitro showed that 40mg of (4-AP)-PLGA films released 70% of encapsulated 4-AP at the first 7 days, but that the film continued to release additional 4-AP for approximately 38 days (N=6 per group).

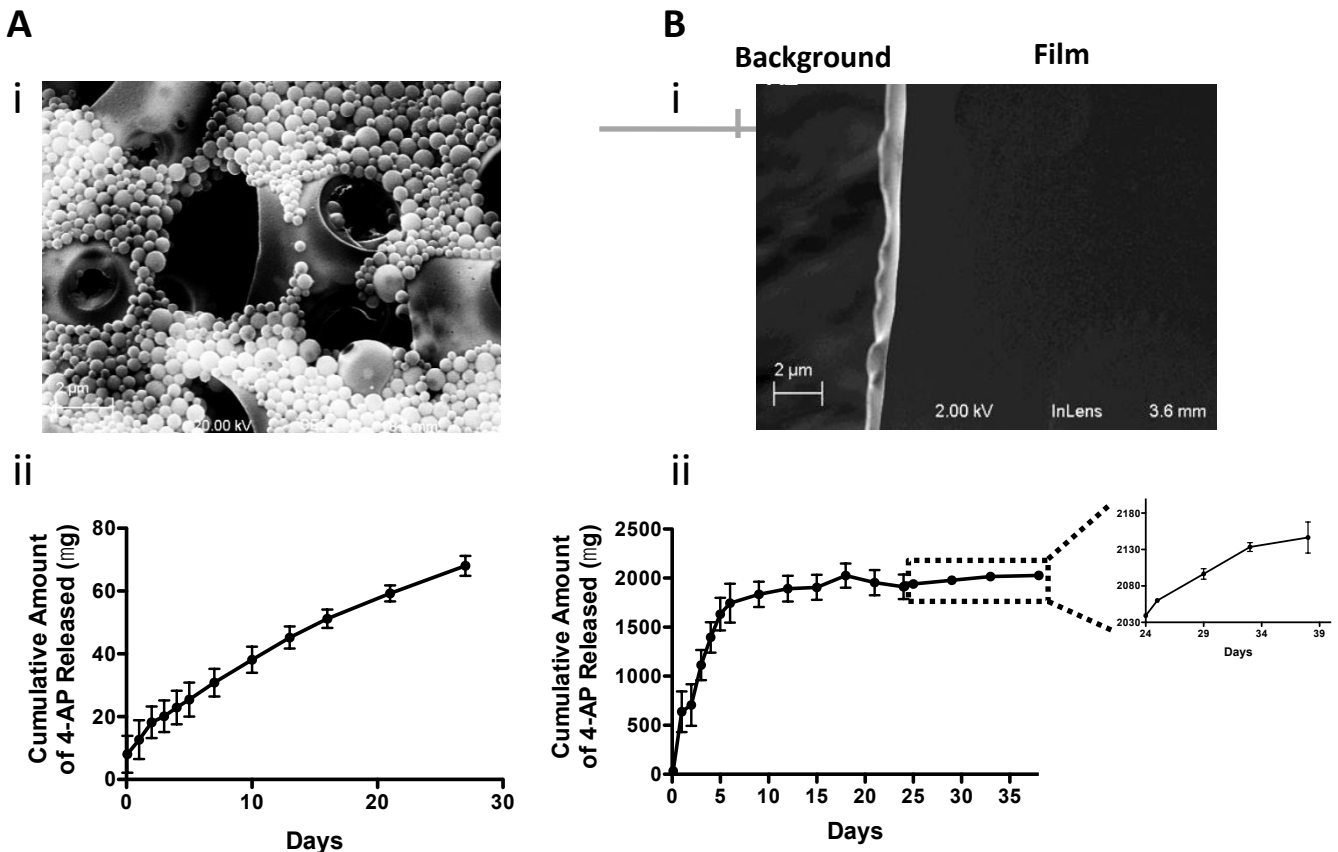

Supplement: usy399_noble_4-aminopyridine_supp_fig_1_30_november_3.pdf [file usy399_noble_4-aminopyridine_supp_fig_1_30_november_3.pdf]
