# Supplementary material
Source: PubMed Central journal article supplement (PMC6490302)
Supplement: usy399_noble_4-aminopyridine_supp_fig_2_30_november_3.pdf [file usy399_noble_4-aminopyridine_supp_fig_2_30_november_3.pdf]

**Figure S2.** Rhodamine-labeled (4-AP)-PLGA carriers remained at the site of placement for at least 21 days. (A, B) Fluorescence emitted from the rhodamine-labeled PLGA carriers could be detected for 2 weeks after implantation. (C) With retrieval surgery, PLGA carriers were found at the site of the sciatic nerve crush injury at 21 days post-injury (N=6 per group).

**A**

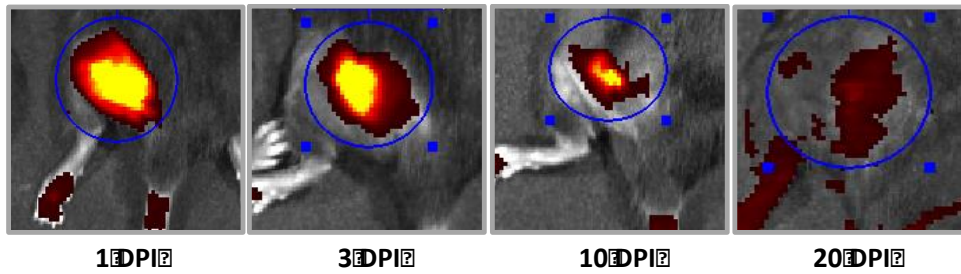

**B**

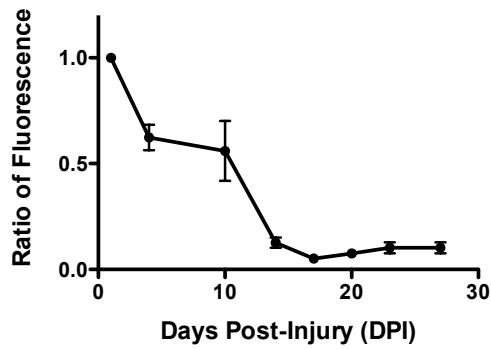

**C**

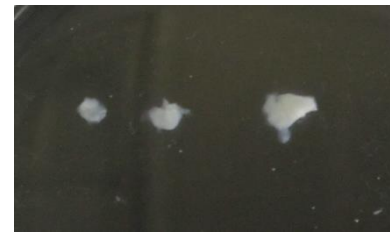

**Residual (4-AP)-PLGA Carriers at 21 DPI**
